# Supplementary material for: Enhanced out-of-plane electromechanical response of Janus ZrSeO
Source: Royal Society of Chemistry journal article supplement (doi:10.1039/d1cp00119a), 2021-01-01
Supplement: d1cp00119a1.pdf [file d1cp00119a1.pdf]

# Enhanced out-of-plane electromechanical response of Janus ZrSeO

Thi Hue Pham, Hamid Ullah, Aamir Shafique, Hye Jung Kim, and Young-Han  
Shin\*

*Multiscale Materials Modeling Laboratory, Department of Physics, University of Ulsan,  
Ulsan 44610, Republic of Korea*

E-mail: hoponpop@ulsan.ac.kr

Table S1: The lattice parameters  $a$  and  $c$  (Å) and elastic coefficients (N/m), and binding energy  $E_b$  (eV/atom) of layered materials in monolayer and bulk structures.

|                   | monolayer |          |          |       | bulk |      |       |          |          |          |          |       |
|-------------------|-----------|----------|----------|-------|------|------|-------|----------|----------|----------|----------|-------|
|                   | $a$       | $C_{11}$ | $C_{12}$ | $E_b$ | $a$  | $c$  | $c/a$ | $C_{11}$ | $C_{12}$ | $C_{13}$ | $C_{33}$ | $E_b$ |
| ZrSeO             | 3.49      | 112      | 31       | 6.29  | 3.52 | 5.23 | 1.49  | 111      | 35       | 15       | 15       | 6.55  |
| ZrSO              | 3.45      | 118      | 30       | 6.46  | 3.47 | 5.06 | 1.46  | 125      | 42       | 24       | 34       | 6.57  |
| ZrSeS             | 3.73      | 71       | 15       | 5.43  | 3.72 | 6.05 | 1.62  | 71       | 15       | 5        | 20       | 5.51  |
| HfSeO             | 3.45      | 122      | 30       | 6.53  | 3.47 | 5.29 | 1.52  | 123      | 35       | 14       | 17       | 6.63  |
| HfSO              | 3.40      | 129      | 30       | 6.64  | 3.42 | 5.12 | 1.50  | 134      | 39       | 20       | 31       | 6.74  |
| HfSeS             | 3.69      | 77       | 15       | 5.52  | 3.68 | 6.06 | 1.65  | 78       | 15       | 5        | 21       | 5.61  |
| MoSeO             | 3.06      | 161      | 44       | 5.46  | 3.05 | 6.02 | 1.97  | 163      | 41       | 4        | 42       | 5.56  |
| MoSO              | 3.00      | 176      | 51       | 5.58  | 3.00 | 5.92 | 1.97  | 178      | 49       | 3        | 37       | 5.66  |
| MoSeS             | 3.26      | 119      | 28       | 4.71  | 3.23 | 6.89 | 2.13  | 125      | 30       | 7        | 37       | 4.96  |
| WSeO              | 3.06      | 181      | 42       | 6.02  | 3.05 | 6.04 | 1.98  | 184      | 40       | 4        | 46       | 6.13  |
| WSO               | 3.00      | 195      | 50       | 6.17  | 2.99 | 5.96 | 1.99  | 196      | 47       | 3        | 65       | 6.24  |
| WSeS              | 3.25      | 131      | 27       | 5.23  | 3.23 | 6.90 | 2.14  | 136      | 26       | 5        | 35       | 5.48  |
| C <sub>2</sub> HF | 2.57      | 247      | 25       | 5.50  | 2.56 | 4.79 | 1.87  | 251      | 28       | 4        | 28       | 5.82  |
| HBNH              | 2.58      | 187      | 26       | 4.12  | 2.58 | 4.22 | 1.64  | 194      | 27       | 0.2      | 25       | 4.47  |
| FBNF              | 2.66      | 189      | 35       | 5.39  | 2.66 | 5.79 | 2.18  | 182      | 32       | 0.7      | 28       | 5.47  |
| HBNF              | 2.60      | 200      | 32       | 3.12  | 2.60 | 5.11 | 1.87  | 205      | 33       | 3        | 59       | 3.22  |

We examined the effect of vacuum thickness ( $h$ ) on spontaneous polarization. The vacuum height  $h$  is defined as the difference between the supercell length normal to the layers and the thickness of the layers. The spontaneous polarization ( $P_3$ ) were obtained with the increase in vacuum thickness of monolayer, bilayer, and trilayer ZrSeO to confirm their convergence which is shown in Fig. S1. If the length of  $c$  of monolayer, bilayer, and trilayer ZrSeO is higher than 22 Å, 28 Å, and 39 Å, respectively, the relative error is smaller than 0.1 %. In this work, we used  $c = 30$  Å for monolayer and bilayer ZrSeO and  $c = 40$  Å for trilayer ZrSeO.

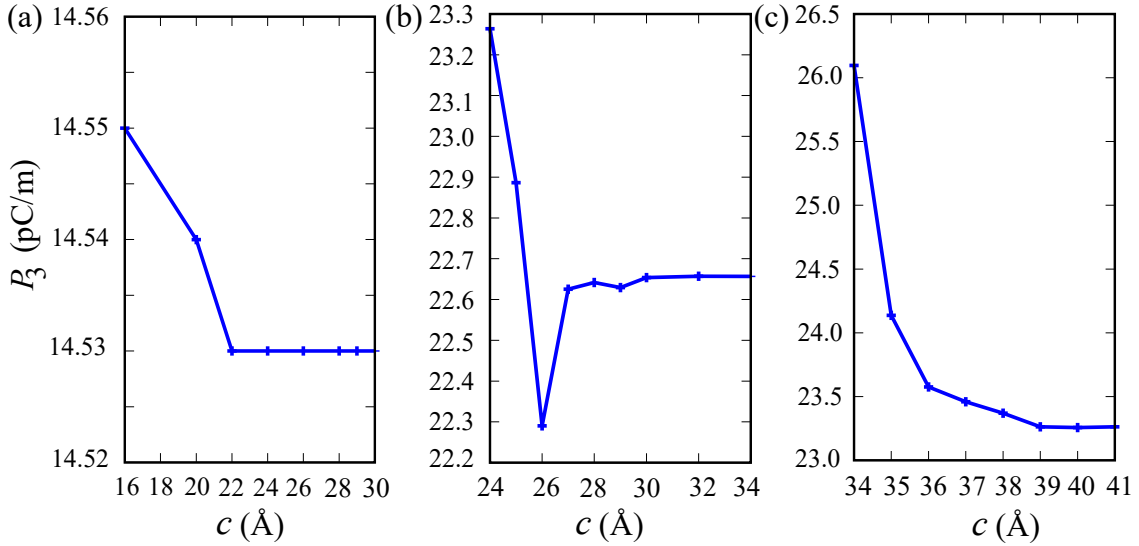

Figure S1: The spontaneous polarization per layer of (a) monolayer, (b) bilayer, and (c) trilayer ZrSeO with different  $c$  via the integration of the charge density method.

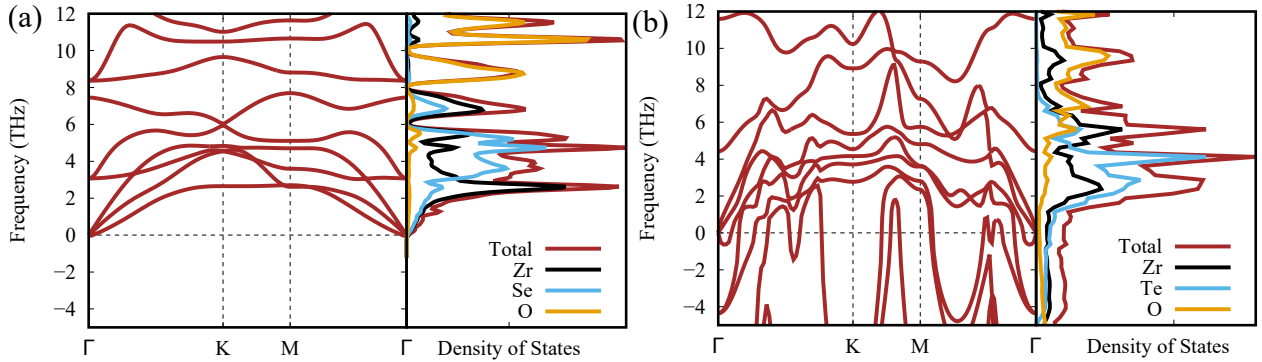

Figure S2: The phonon dispersion relations of (a) ZrSeO and (b) ZrTeO.

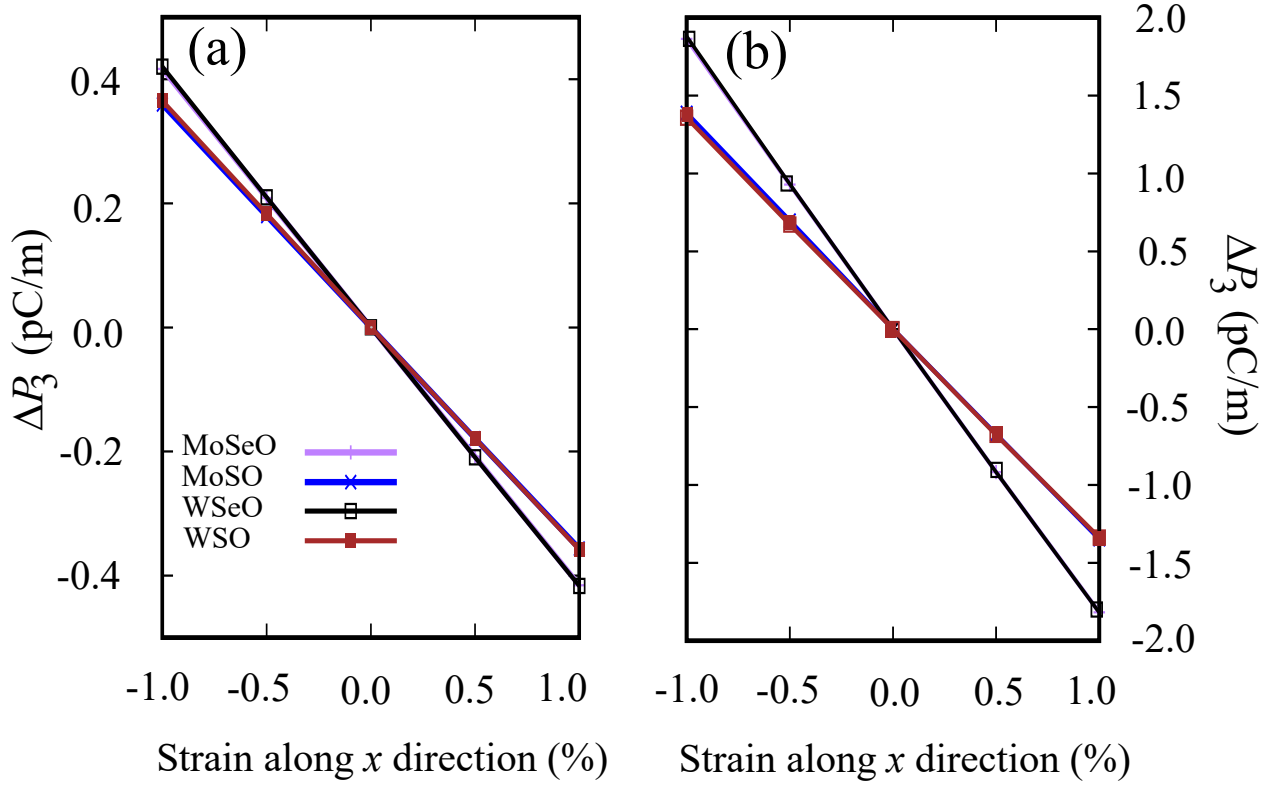

Figure S3: The out-of-plane polarization change ( $\Delta P_3$ ) under the applied uniaxial strain along the  $x$  direction of (a) the monolayer and (b) bulk  $MXO$  ( $M = \text{Mo}, \text{W}; X = \text{S}, \text{Se}$ ).

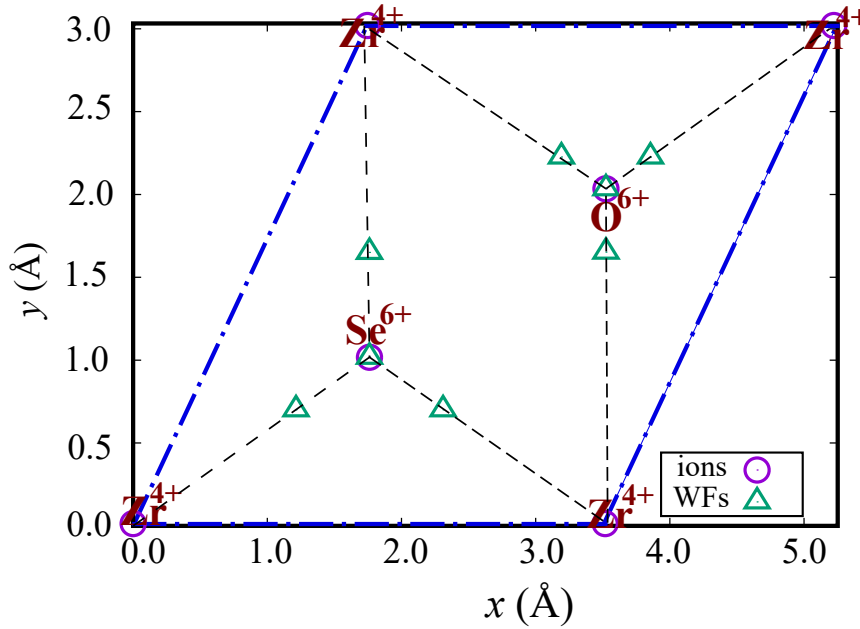

Figure S4: Top view of Wannier function (WF) centers (cyan triangle) of O and Se atoms on ZrSeO.

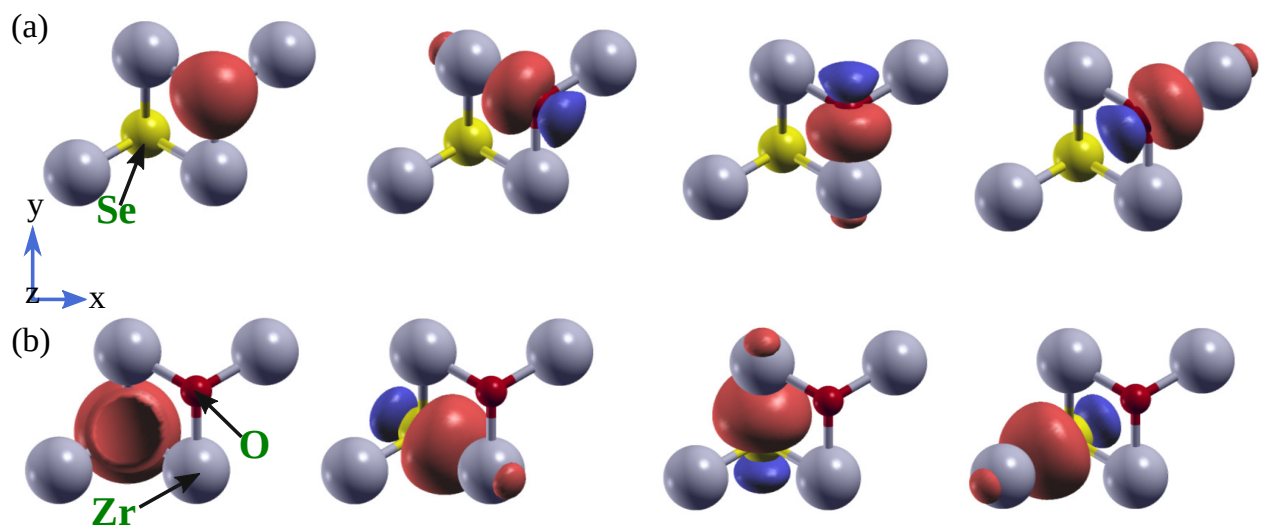

Figure S5: The maximally localized Wannier functions (MLWFs) of (a) O and (b) Se atoms on bulk ZrSeO.
